# Supplementary material for: A single aromatic residue in transcriptional repressor protein KorA is critical for cooperativity with its co-regulator KorB
Source: PubMed Central journal article supplement (PMC2680271; doi:10.1111/j.1365-2958.2008.06498.x), 2008-10-29
Supplement: mmi0070-1502-SD1.pdf [file mmi0070-1502-SD1.pdf]

**Supplementary Table S1. Primers used for PCR mutagenesis of *korA*.**

Primer suffixes: F, forwards; R, reverse. In each PCR, flanking primers ECO\_KORA\_F and KORA\_SAL\_R were used in combination with a pair of overlapping F and R central (mutagenic) primers. All oligonucleotides are written in 5'-3' orientation. The mutagenised nucleotide is shown in lower case font. Not all changes have F and R primers, as sometimes the F primer for one mutation was used in combination with the R primer for a different mutation, the two products being segregated on cloning. To make mutations towards the 3' end of *korA* (e.g. K95A), a standard PCR reaction was carried out with ECO\_KORA\_F in combination with a long mutagenic R primer.

| <b>Name</b> | <b>Sequence</b>                    |
|-------------|------------------------------------|
| ECO_KORA_F  | CGAATTCATGAAGAAACGGCTTACC          |
| KORA_SAL_R  | CGTCGACTCATCGTTTGGTTTCCTG          |
| KORA_L67A_F | CCCTCGGGCgcGTTCTTGTCCCTCG          |
| KORA_P68A_F | GAGGACAAGAACTTgCCGAGG              |
| KORA_P68A_R | CCTCGGcCAAGTTCTTGTCCCTCG           |
| KORA_E69A_F | AACTTGCCCCgGGGTACGCGC              |
| KORA_Y71A_F | GCCCGAGGGGgcCGCGCGGGTAAC           |
| KORA_Y71A_R | GCGCGgcCCCCTCGGGCAAGTTC            |
| KORA_A72S_F | CGAGGGGTACTcCGCGGGTAACG            |
| KORA_R73A_F | AGGGGTACGCGgcGGTAACGGCGGTTC        |
| KORA_V74A_F | TACGCGCGGGcAACGGCGGTTC             |
| KORA_V74A_R | GGCAGAACC GCCGTTgCCC GCGGTACCCCTCG |
| KORA_A76S_R | CCGGCAGAACCgaCGTTACCCGC            |
| KORA_L78A_R | CCTGATGTTCCGGCgcAACCGCCGTACCCG     |
| KORA_P79A_F | GGTTCTGgcGGAACATCAGGCGTAC          |
| KORA_E80A_F | CGGTTCTGCCGGcACATCAGGCG            |
| KORA_E80A_R | CGCCTGATGTgCCGGCAGAAC              |
| KORA_H81A_F | CTGCCGGAAgcTCAGGCGTACATCG          |
| KORA_H81A_R | GTACGCCTGAgcTTCCGGCAGAACC          |
| KORA_Q82A_F | CCGGAACATgGCCTACATCGTCCGG          |
| KORA_A83S_F | GGAACATCAGtCGTACATCGTCCG           |
| KORA_Y84A_R | TTCCGGACGATGgcCGCCTGATGTTCC        |
| KORA_Y84H_F | ACATCAGGCGcACATCGTCCGGA            |
| KORA_Y84F_R | CTTCCGGACGATGaACGCCTGATG           |
| KORA_Y84S_R | CTTCCGGACGATGgACGCCTGATG           |
| KORA_I85A_R | TCCC ACTTCCGGACGgcGTACGCCTG        |
| KORA_V86A_R | CTTCCGGgCGATGTACGCCTGATG           |
| KORA_R87A_F | GGCGTACATCGTCgcGAAGTGGGAAG         |
| KORA_R87A_R | TCCC ACTTcgcGACGATGTACGCC          |
| KORA_R87D_F | GGCGTACATCGTCgacAAGTGGGAAG         |

|             |                                         |
|-------------|-----------------------------------------|
| KORA_R87E_R | TTCCCACTTcTcGACGATGTACGCC               |
| KORA_R87L_R | TCCCACTTCaGGACGATGTACGCC                |
| KORA_K88A_F | GCGTACATCGTCCGGgcGTGGGAAGCG             |
| KORA_K95A_R | GTCGACTCATCGTTTGGTTTCCTGTTTTgcCTTGGCGTC |
